# Supplementary material for: Luteapyrone, a Novel ƴ-Pyrone Isolated from the Filamentous Fungus Metapochonia lutea
Source: MDPI journal article supplement (doi:10.3390/molecules26216589), 2021-10-30
Supplement: s1 [file s1]

## Supplementary Information

### Luteapyrone, a novel $\gamma$ -pyrone isolated from the filamentous fungus *Metapochonia lutea*

Roman Labuda<sup>a,b,\*</sup>, Markus Bacher<sup>c</sup>, Hannes Gratzl<sup>b,d</sup>, Maria Doppler<sup>b,d</sup>, Alexandra Parich<sup>d</sup>,  
Mohammed Aufy<sup>e</sup>, Rosa Lemmens-Gruber<sup>e</sup>, Rainer Schuhmacher<sup>b,d</sup>, Kathrin Rychli<sup>a,b</sup>,  
Martin Wagner<sup>a,b</sup>, Thomas Rosenau<sup>c,g</sup>, Joseph Strauss<sup>b,f</sup>, Christoph Schüller<sup>b,f</sup>

**Figure. S1:** <sup>1</sup>H NMR spectra of **1**

**Figure. S2:** <sup>1</sup>H NMR spectra of **1** (expansion)

**Figure. S3:** <sup>13</sup>C NMR spectra of **1**

**Figure. S4:** <sup>13</sup>C NMR spectra of **1** (expansion)

**Figure. S5:** COSY spectrum of **1**

**Figure. S6:** Edited HSQC spectrum of **1**

**Figure. S7:** HMBC spectrum of **1**

**Figure. S8:** HPLC of **1**

**Figure. S9:** Flash Chromatography of **1**

**Table S1.** Cytotoxic activity of **1**

**Table S2.** Antimicrobial activity of **1**

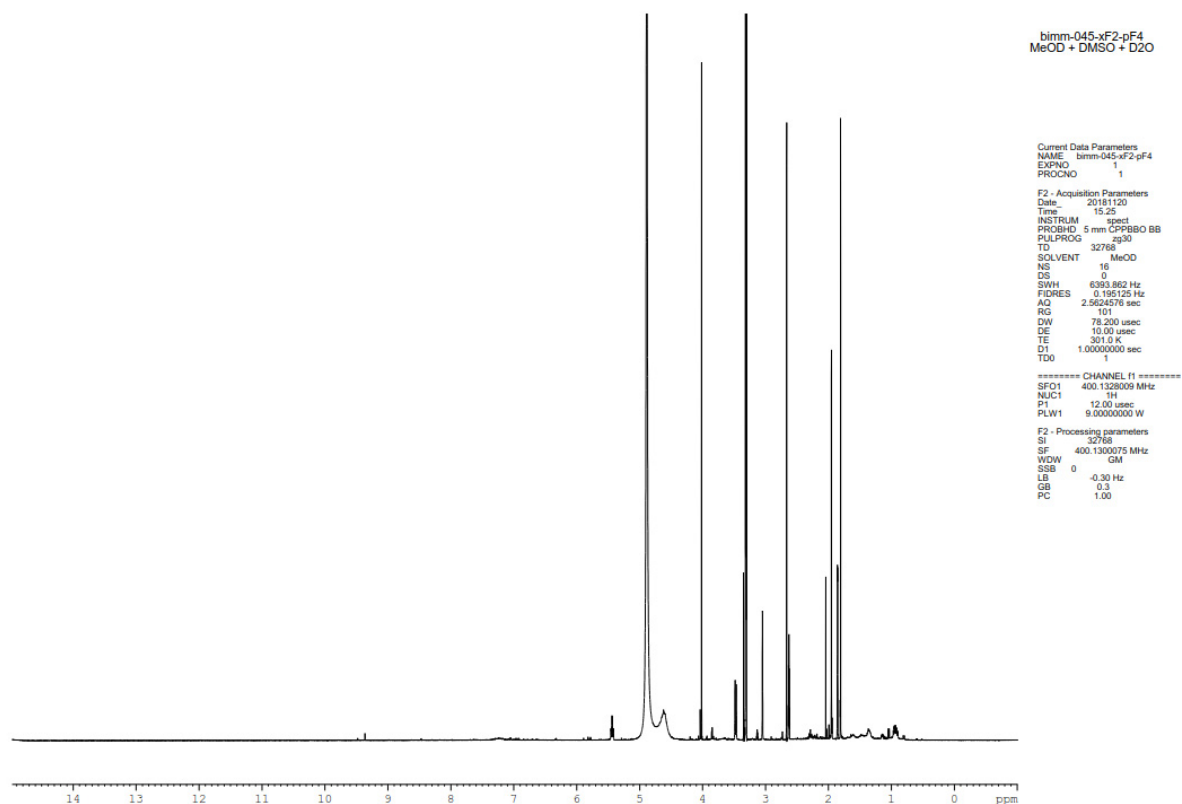

**Figure. S1:**  $^1\text{H}$  NMR spectrum of **1**

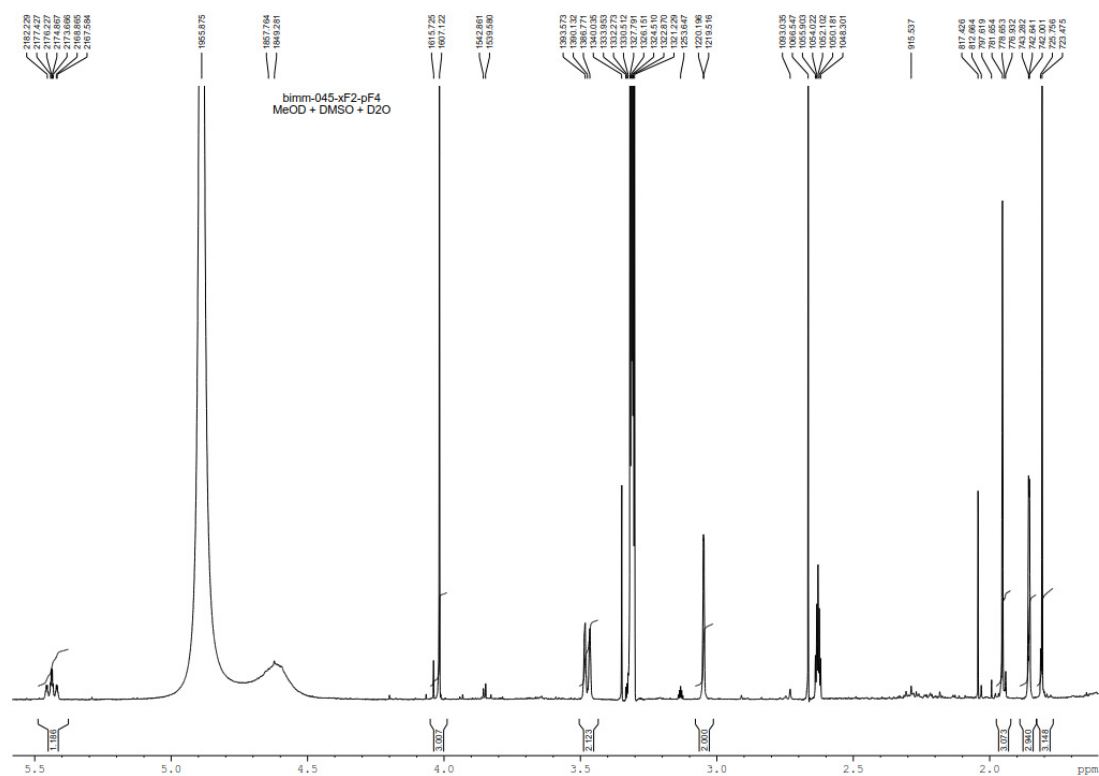

**Figure. S2:**  $^1\text{H}$  NMR spectrum of **1** (expansion)

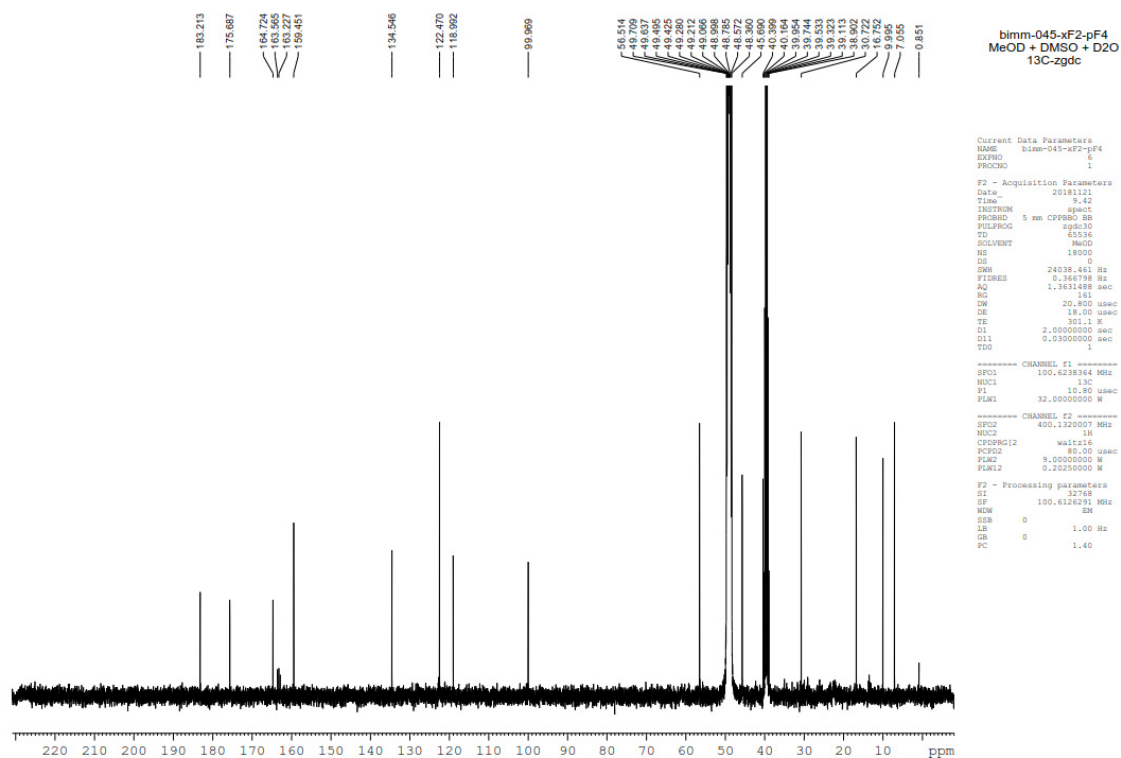

**Figure. S3:**  $^{13}\text{C}$  NMR spectrum of **1**

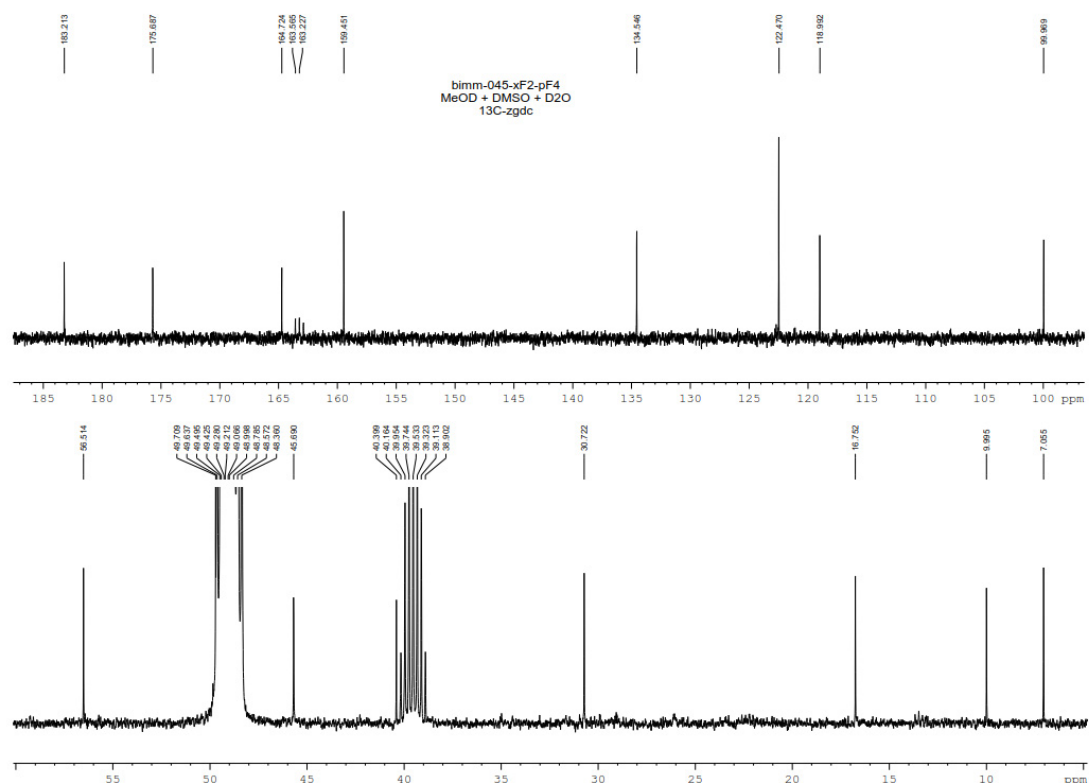

**Figure. S4:**  $^{13}\text{C}$  NMR spectrum of **1** (expansion)



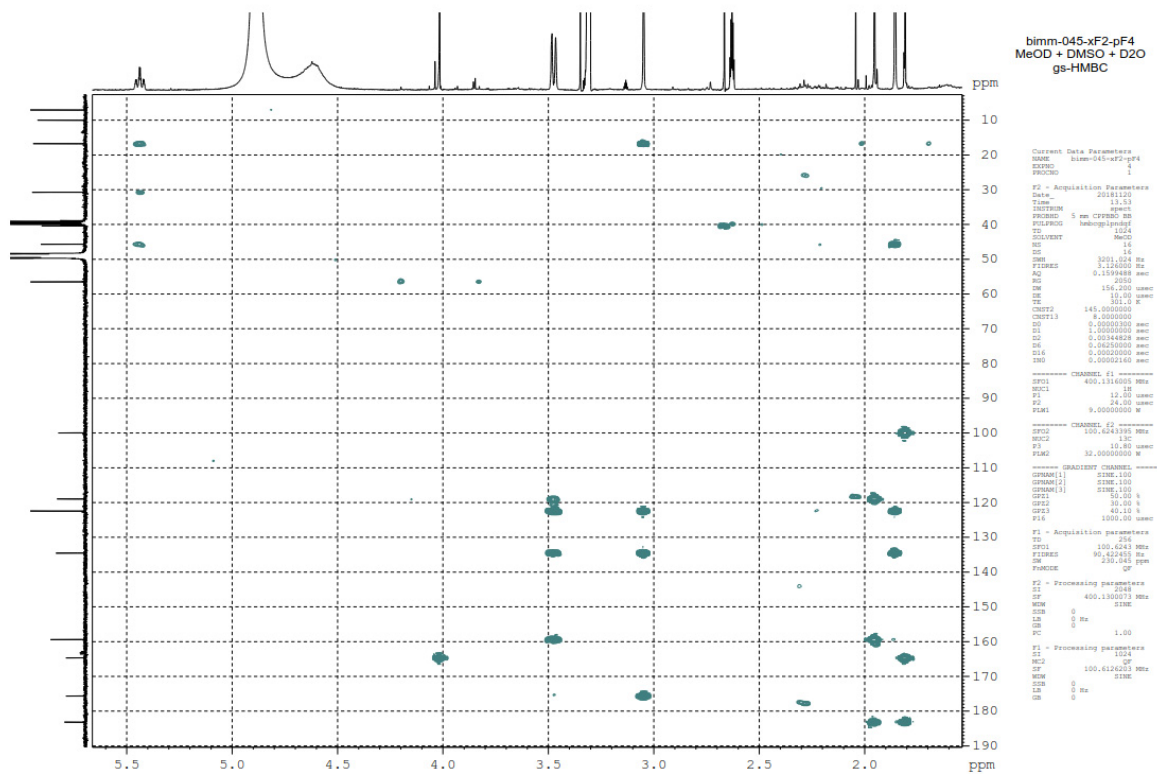

**Figure. S7:** HMBC spectrum of **1**

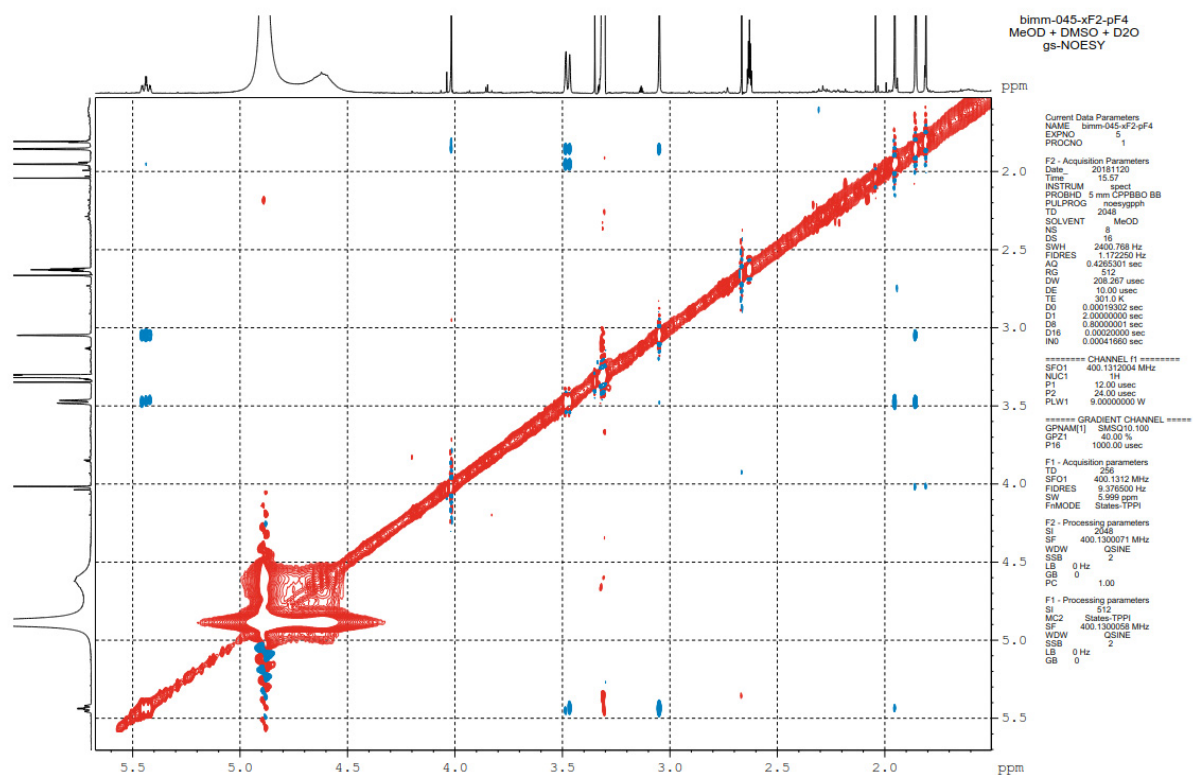

Figure. S8: HPLC of 1

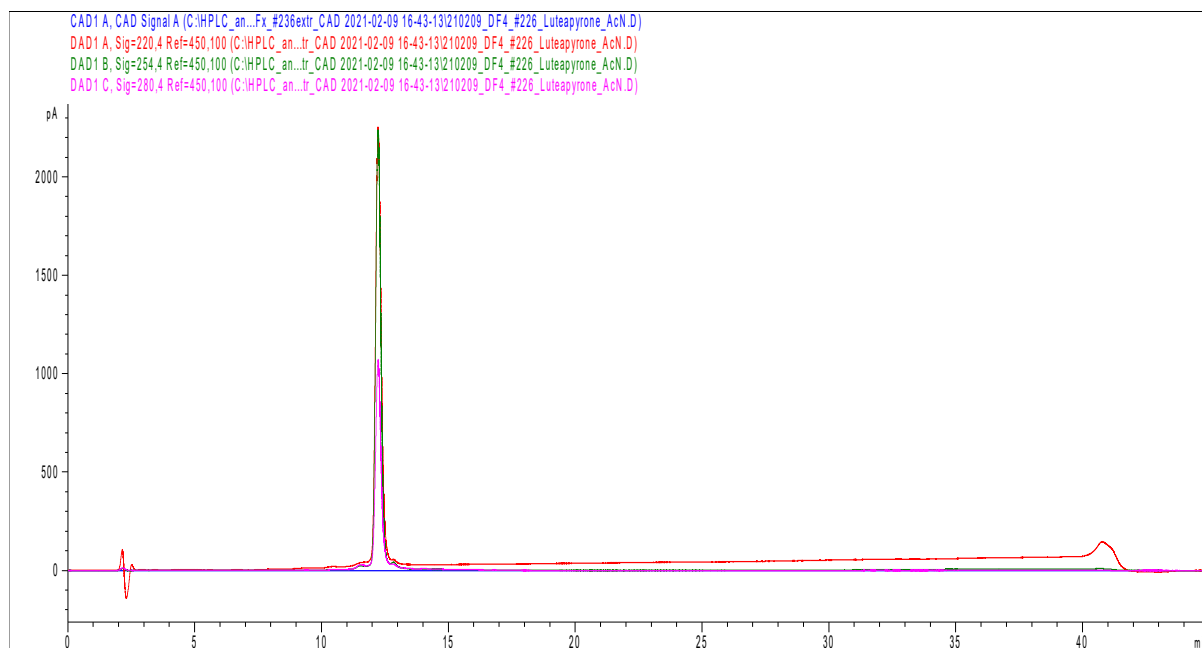

Figure. S9: Reveleris Flash Chromatography with Flow Rate Table



**Elution Steps**

| N° | Time     | Flow Rate | %A  | %B  |
|----|----------|-----------|-----|-----|
| 01 | 00 s     | 15.0      | 90  | 10  |
| 02 | 18 s     | 15.0      | 89  | 11  |
| 03 | 01:04    | 15.0      | 89  | 11  |
| 04 | 01:09    | 15.0      | 89  | 11  |
| 05 | 01:58    | 15.0      | 89  | 11  |
| 06 | 03:25    | 15.0      | 86  | 14  |
| 07 | 03:26    | 15.0      | 86  | 14  |
| 08 | 06:33    | 15.0      | 80  | 20  |
| 09 | 08:13    | 15.0      | 80  | 20  |
| 10 | 11:49    | 15.0      | 73  | 27  |
| 11 | 13:14    | 15.0      | 73  | 27  |
| 12 | 25:21    | 15.0      | 48  | 52  |
| 13 | 31:29    | 15.0      | 48  | 52  |
| 14 | 38:30    | 15.0      | 34  | 66  |
| 15 | 38:36    | 15.0      | 00  | 100 |
| 16 | 41:45    | 25.0      | 00  | 100 |
| 17 | 44:22    | 25.0      | 00  | 100 |
| 18 | 44:25    | 30.0      | 00  | 100 |
| 19 | 46:19    | 30.0      | 00  | 100 |
| 20 | 46:22    | 15.0      | 00  | 100 |
| 21 | 46:40    | 15.0      | 00  | 100 |
| 22 | 46:43    | 30.0      | 00  | 100 |
| 23 | 51:51    | 30.0      | 00  | 100 |
| 24 | 52:09    | 30.0      | 12  | 88  |
| 25 | 52:12    | 15.0      | 12  | 88  |
| 26 | 52:29    | 15.0      | 25  | 75  |
| 27 | 52:32    | 25.0      | 25  | 75  |
| 28 | 54:06    | 25.0      | 100 | 00  |
| 29 | 59:06    | 25.0      | 100 | 00  |
| 30 | 01:04:03 | 25.0      | 100 | 00  |
| 31 | 01:09:03 | 25.0      | 100 | 00  |

**Detection Steps**

| N° | Time | Parameter              | Collect | Threshold | F1 |
|----|------|------------------------|---------|-----------|----|
| 01 | 00 s | UV400:SIG1 ==> 254 nm  | Yes     | 25        | 3  |
|    |      | UV400:SCAN ==> 200-400 | Yes     | 5         | 3  |



**Table S1.** Cytotoxic activity of luteapyrone (5-320  $\mu$ M)

| HEK-293             |                   |                          | KB-3-1              |                   |                          | Caco-2              |                   |                          |
|---------------------|-------------------|--------------------------|---------------------|-------------------|--------------------------|---------------------|-------------------|--------------------------|
| Conc.<br>( $\mu$ M) | Control<br>(DMSO) | Luteapyrone              | Conc.<br>( $\mu$ M) | Control<br>(DMSO) | Luteapyrone              | Conc.<br>( $\mu$ M) | Control<br>(DMSO) | Luteapyrone              |
| 5                   | 2.879             | 2.351                    | 5                   | 1.513             | 1.918                    | 5                   | 2.635             | 2.660                    |
|                     | 2.341             | 2.631                    |                     | 1.973             | 1.716                    |                     | 2.611             | 2.228                    |
|                     | 2.226             | 2.761                    |                     | 1.820             | 1.425                    |                     | 2.352             | 2.413                    |
|                     | <b>2.490</b>      | <b>2.460</b><br>(98.8%)  |                     | <b>1.769</b>      | <b>1.686</b><br>(95.3%)  |                     | <b>2.533</b>      | <b>2.434</b><br>(96.1%)  |
| 10                  | 2.351             | 2.065                    | 10                  | 1.660             | 1.532                    | 10                  | 2.183             | 2.318                    |
|                     | 2.631             | 2.699                    |                     | 1.685             | 1.781                    |                     | 2.514             | 2.361                    |
|                     | 2.761             | 2.781                    |                     | 1.609             | 1.627                    |                     | 2.287             | 2.507                    |
|                     | <b>2.581</b>      | <b>2.515</b><br>(97.4%)  |                     | <b>1.651</b>      | <b>1.647</b><br>(99.8%)  |                     | <b>2.328</b>      | <b>2.395</b><br>(102.9%) |
| 20                  | 2.348             | 2.618                    | 20                  | 1.501             | 1.687                    | 20                  | 2.720             | 2.087                    |
|                     | 2.565             | 2.660                    |                     | 1.320             | 1.72                     |                     | 2.719             | 2.245                    |
|                     | 2.310             | 2.327                    |                     | 1.721             | 1.356                    |                     | 2.524             | 2.249                    |
|                     | <b>2.420</b>      | <b>2.535</b><br>(104.8%) |                     | <b>1.514</b>      | <b>1.590</b><br>(105.0%) |                     | <b>2.654</b>      | <b>2.194</b><br>(82.7%)  |
| 40                  | 2.879             | 2.141                    | 40                  | 1.280             | 1.500                    | 40                  | 2.660             | 2.518                    |
|                     | 2.222             | 2.798                    |                     | 1.660             | 1.570                    |                     | 2.328             | 2.043                    |
|                     | 2.637             | 2.313                    |                     | 1.536             | 1.498                    |                     | 2.329             | 2.430                    |
|                     | <b>2.579</b>      | <b>2.417</b><br>(93.7%)  |                     | <b>1.492</b>      | <b>1.523</b><br>(102.1%) |                     | <b>2.439</b>      | <b>2.330</b><br>(95.5%)  |
| 80                  | 2.470             | 2.678                    | 80                  | 1.413             | 1.440                    | 80                  | 2.321             | 2.230                    |
|                     | 2.388             | 2.416                    |                     | 1.627             | 1.389                    |                     | 2.128             | 2.814                    |
|                     | 2.308             | 2.415                    |                     | 1.452             | 1.570                    |                     | 2.587             | 2.042                    |
|                     | <b>2.389</b>      | <b>2.506</b><br>(104.9%) |                     | <b>1.497</b>      | <b>1.466</b><br>(97.9%)  |                     | <b>2.345</b>      | <b>2.362</b><br>(100.7%) |
| 160                 | 2.022             | 2.154                    | 160                 | 1.256             | 1.236                    | 160                 | 1.981             | 1.736                    |
|                     | 2.321             | 2.418                    |                     | 1.213             | 1.330                    |                     | 2.015             | 1.983                    |
|                     | 2.287             | 2.045                    |                     | 1.061             | 1.111                    |                     | 2.081             | 1.836                    |
|                     | <b>2.210</b>      | <b>2.196</b><br>(99.4%)  |                     | <b>1.177</b>      | <b>1.226</b><br>(104.2%) |                     | <b>2.026</b>      | <b>1.852</b><br>(91.5%)  |
| 320                 | 2.063             | 2.218                    | 320                 | 1.098             | 1.070                    | 320                 | 1.698             | 1.552                    |
|                     | 1.987             | 2.067                    |                     | 1.017             | 0.915                    |                     | 1.618             | 1.483                    |
|                     | 2.105             | 2.157                    |                     | 1.148             | 1.115                    |                     | 1.826             | 1.313                    |
|                     | <b>2.052</b>      | <b>2.147</b><br>(104.6%) |                     | <b>1.088</b>      | <b>1.033</b><br>(94.9%)  |                     | <b>1.714</b>      | <b>1.449</b><br>(84.5%)  |

**Table S2.** Antimicrobial activity of luteapyrone

| Microorganisms <sup>a</sup>             | MIC (μM) |
|-----------------------------------------|----------|
| <i>Staphylococcus aureus</i> ATCC 6538  | >985     |
| <i>Escherichia coli</i> ATCC 25922      | >985     |
| <i>Klebsiella pneumoniae</i> ATCC 10031 | >985     |
| <i>Pseudomonas aeruginosa</i> ATCC 9027 | >985     |
| <i>Candida albicans</i> ATCC 10231      | >985     |
| <i>Aspergillus fumigatus</i> RL 578     | >985     |
| <i>Fusarium oxysporum</i> RL 108        | >985     |
| <i>Fusarium solani</i> RL 585           | >985     |

<sup>a</sup>ATCC, American Type Culture Collection, Manassas, VA, USA; RL personal fungal collection of Roman Labuda
